# Supplementary material for: Electrochemical synthesis of a nanohybrid film consisting of stacked graphene sheets and manganese oxide as oxygen evolution reaction catalyst
Source: Royal Society of Chemistry journal article supplement (doi:10.1039/c6ra00255b), 2016-01-01
Supplement: c6ra00255b1.pdf [file c6ra00255b1.pdf]

Electronic Supplementary Information

**Electrochemical Synthesis of a Nanohybrid Film Consisting of  
Stacked Graphene Sheets and Manganese Oxide as Oxygen  
Evolution Reaction Catalyst**

Masaharu Nakayama,<sup>\*a</sup> Yusuke Fujii,<sup>a</sup> Kotaro Fujimoto,<sup>a</sup> Makoto Yoshimoto,<sup>a</sup> Aya Kaide,<sup>b</sup>

Takashi Saeki<sup>b</sup> and Hironori Asada<sup>c</sup>

<sup>a</sup>*Materials Chemistry, Graduate School of Science and Engineering, Yamaguchi University, 2-16-1, Tokiwadai, Ube 755-8611, Japan*

<sup>b</sup>*Environmental Science and Engineering, Graduate School of Science and Engineering, Yamaguchi University, 2-16-1, Tokiwadai, Ube 755-8611, Japan*

<sup>c</sup>*Electronic Energy and Power Devices Engineering, Graduate School of Science and Engineering, Yamaguchi University, 2-16-1, Tokiwadai, Ube 755-8611, Japan*

\*Masaharu Nakayama, E-mail: nkymm@yamaguchi-u.ac.jp

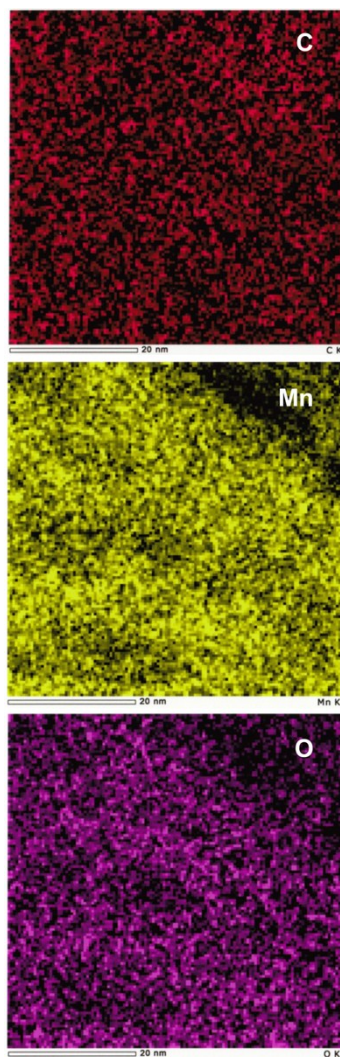

**Fig. S1** EDS mapping of C (red), Mn (yellow), and O (purple) elements in the cross section of the electrodeposited film with PDDA-GR<sup>+</sup>.

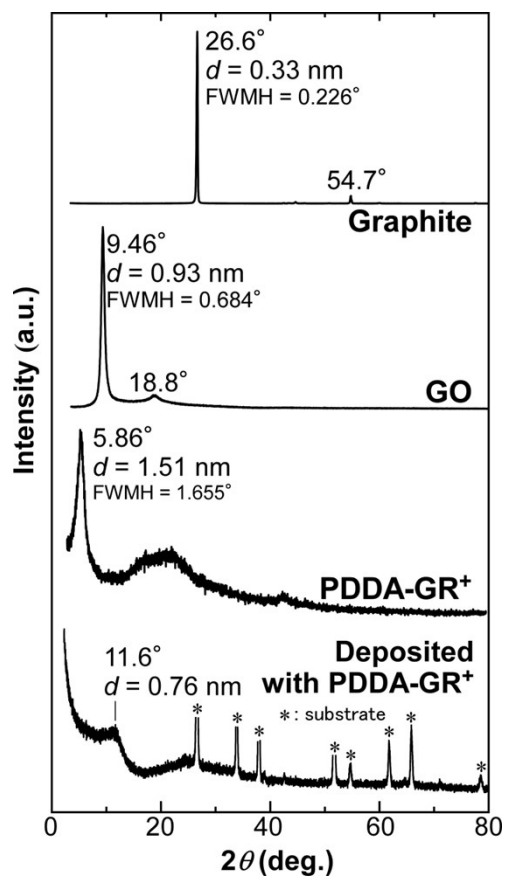

**Fig. S2** XRD patterns of graphite, GO, and PDDA-GR<sup>+</sup> in a powder form and that of the electrodeposited film with PDDA-GR<sup>+</sup>.

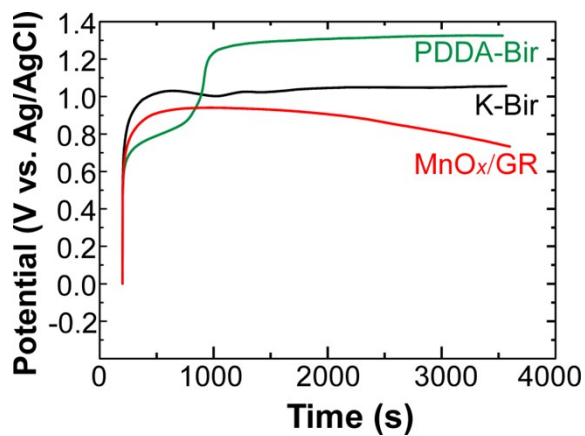

**Fig. S3** Potential-time curves obtained for the electrolysis of aqueous Mn<sup>2+</sup> ions in the presence of K<sup>+</sup>, PDDA<sup>+</sup>, and PDDA-GR<sup>+</sup> at a constant anodic current density of  $0.06$  mA cm<sup>-2</sup>.

We conducted another stability test using a HR-103A rotating disk electrode system (Hokuto Denko).  $\text{MnO}_x/\text{GR}$  film was loaded on a glassy carbon disk electrode ( $0.20 \text{ cm}^2$ ) by the similar procedure described in the main text. The modified electrode was subjected to potential cycling for 1,000 cycles between 1.2 and 2.1 V at a scan rate of  $100 \text{ mV s}^{-1}$  in 0.1 M KOH solution, and the rotating rate was 1600 rpm. The anodic curves at 1st, 500th, and 1,000th cycles are depicted in **Fig. S4**. Note that the activity of the catalyst film remained unchanged at least 1,000 cycles.”

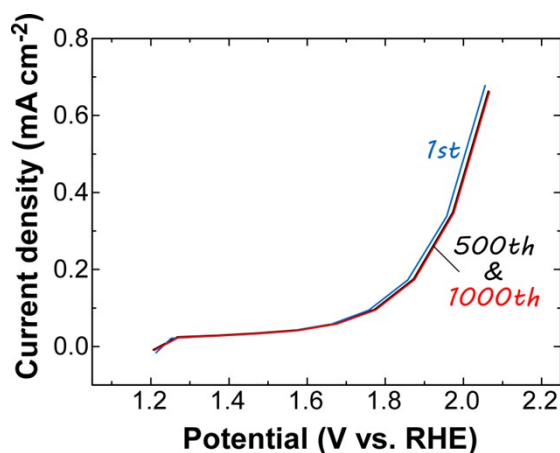

**Fig. S4** Stability test for  $\text{MnO}_x/\text{GR}$  film-modified glassy carbon electrode in 0.1 M KOH solution. Anodic curves were recorded at 1st, 500th, and 1000th cycles in the potential cycling at a scan rate of  $100 \text{ mV s}^{-1}$  between 1.2 and 2.1 V.
